# Supplementary material
Source: Springer Nature journal article supplement (https://www.springermedizin.de/resource/supplementary/12986_2006_96_MOESM3_ESM.pdf/25655372)

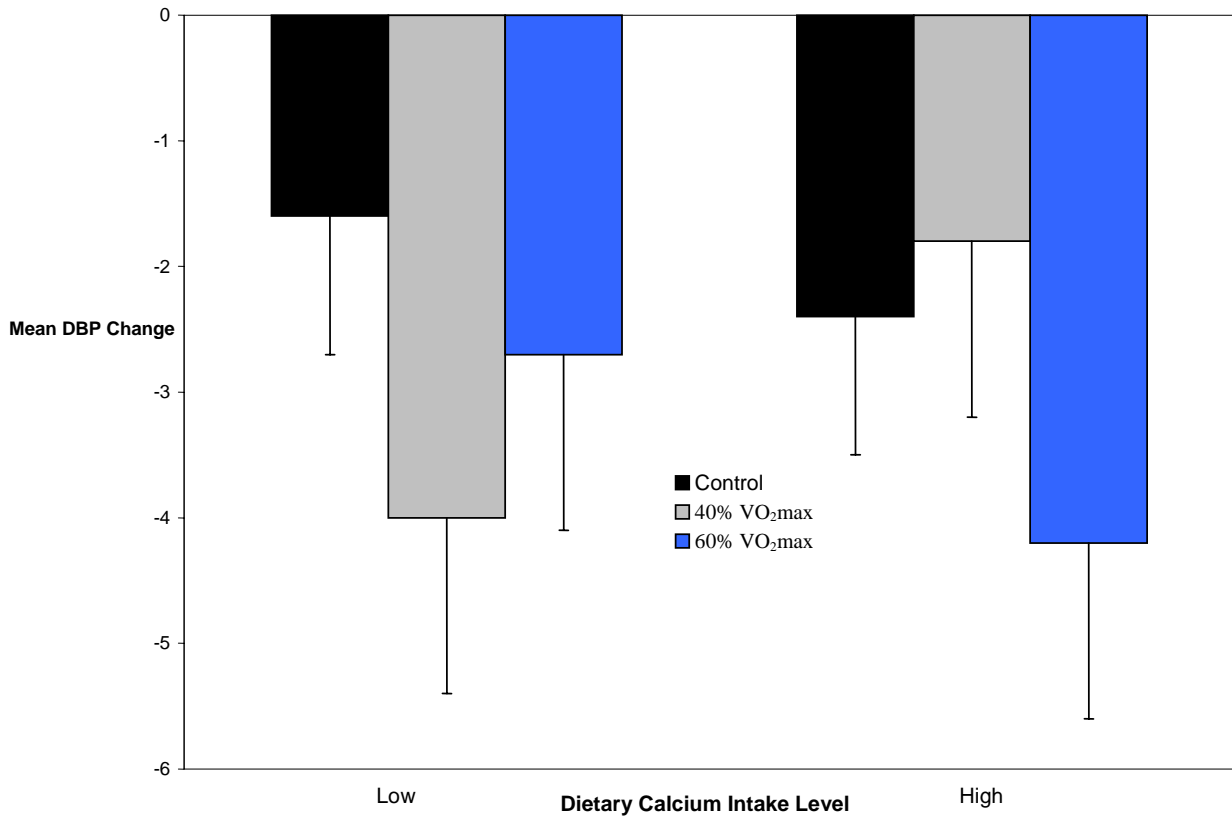

Supplement: MOESM3 [file 25655372]
